# In vivo birthdating by BAPTISM reveals that trigeminal sensory neuron diversity depends on early neurogenesis

Sophie J. C. Caron<sup>1,2</sup>, David Prober<sup>1,\*</sup>, Margaret Choy<sup>1,2,\*</sup> and Alexander F. Schier<sup>1,†</sup>

Among sensory systems, the somatic sense is exceptional in its ability to detect a wide range of chemical, mechanical and thermal stimuli. How this sensory diversity is established during development remains largely elusive. We devised a method (BAPTISM) that uses the photoconvertible fluorescent protein Kaede to simultaneously analyze birthdate and cell fate in live zebrafish embryos. We found that trigeminal sensory ganglia are formed from early-born and late-born neurons. Early-born neurons give rise to multiple classes of sensory neurons that express different ion channels. By contrast, late-born neurons are restricted in their fate and do not form chemosensory neurons expressing the ion channel TrpA1b. Accordingly, larvae lacking early-born neurons do not respond to the TrpA1b agonist allyl isothiocyanate. These results indicate that the multimodal specification and function of trigeminal sensory ganglia depends on the timing of neurogenesis.

**KEY WORDS:** Neurogenesis, Trigeminal sensory ganglia, Trp, Zebrafish

## INTRODUCTION

Somatosensory organs recognize a wide range of stimuli such as noxious chemicals, pressure and temperature (for a review, see Julius and Basbaum, 2001). The vertebrate somatosensory system consists of sets of sensory ganglia located in the peripheral nervous system (PNS) (for a review, see Lynn, 1975). Trigeminal sensory ganglia innervate most of the head (Noden, 1980), whereas the dorsal root ganglia (DRG) flank the spinal cord and innervate the body (Swett and Woolf, 1985). Trigeminal sensory neurons project to several brainstem nuclei, whereas DRG neurons send afferent axons to the spinal cord (for a review, see Marmigere and Ernfors, 2007).

The multimodal nature of the information detected by the somatosensory system is reflected in the neuronal diversity of sensory ganglia (for reviews, see Julius and Basbaum, 2001; Marmigere and Ernfors, 2007). Two major subpopulations of somatosensory neurons can be distinguished: the proprioceptive neurons transduce innocuous stimuli such as light touch, whereas the nociceptive neurons detect potentially harmful stimuli. To cover a wide range of sensory information, nociceptive neurons express diverse channels and receptors that respond to these stimuli. For example, TrpV1 is a heat sensing channel expressed in thermosensitive neurons (Caterina et al., 1997), whereas TrpA1 is expressed in a subset of neurons responsive to chemical irritants such as allyl isothiocyanate (mustard oil), the pungent ingredient of mustard (Bandell et al., 2004; Jordt et al., 2004). Another subset of neurons is defined by expression of the P2X3 receptor, an ATP sensor involved in the modulation of nociceptive signals (Chen et al., 1995). Thus, in contrast to other sensory systems, the

somatosensory ganglia contain a diverse array of sensory neurons that are tuned to very distinct classes of stimuli. How this diversity is achieved during development is poorly understood.

Studies of the central nervous systems (CNS) in both vertebrates and invertebrates have revealed that the temporal pattern of neuron specification contributes to the generation of neuronal diversity (for a review, see Pearson and Doe, 2004). During development of *Drosophila melanogaster*, for example, neuroblasts undergo stem cell-like divisions to generate neuronal progeny in an ordered sequence (Truman and Bate, 1988; Pearson and Doe, 2003). Similarly, different neurons of the layered mammalian cortex form at precise developmental times (for a review, see McConnell, 1995). Neurons located deep in the cortex are born before neurons that populate more superficial layers, resulting in an inside out progression of neurogenesis. In both systems, progenitors gradually lose competence to generate early-born fates. In the PNS, cell birthdating and genetic studies in mouse and chick suggest that DRG neurons derive from three waves of neurogenesis (Carr and Simpson, 1978; Frank and Sanes, 1991; Lawson and Biscoe, 1979; Ma et al., 1999; Maro et al., 2004; Marmigere and Ernfors, 2007). The second wave gives rise to the majority of proprioceptive and nociceptive neurons, whereas the first and third waves generate predominantly proprioceptive and nociceptive neurons, respectively. It is unclear whether similar or different strategies are used during the diversification of trigeminal sensory neurons or how different nociceptive subsets are specified. Here, we address these issues using the zebrafish trigeminal ganglia as a model system.

Similar to other vertebrates, the trigeminal sensory ganglia in zebrafish form on either side of the head, between the eye and ear (Fig. 1A). The first trigeminal sensory neurons are born at around 11 hours post fertilization (hpf) and rapidly assemble into a ganglion (Knaut et al., 2005). By 24 hpf, the ganglia mediate the response to mechanical stimuli (Saint-Amant and Drapeau, 1998) and chemical irritants (D.P. and A.F.S., unpublished), resulting in a highly stereotypic escape behavior. It has remained unclear how the different modalities within the trigeminal ganglia are generated. To address this issue, we analyzed how the timing of neurogenesis regulates trigeminal sensory neuron specification. We developed a novel technology (BAPTISM) to compare neuronal birth date and specification in vivo and interfered with early or late periods of

<sup>1</sup>Department of Molecular and Cellular Biology, Center for Brain Science, Broad Institute, Harvard Stem Cell Institute, Harvard University, 16 Divinity Avenue, Cambridge, MA 02138, USA. <sup>2</sup>Developmental Genetics Program, New York University School of Medicine, New York, NY 10016, USA.

\*These authors contributed equally to this work

<sup>†</sup>Author for correspondence (e-mail: schier@mcb.harvard.edu)

neurogenesis. Our results indicate that the full repertoire of trigeminal sensory neuron cell types and larval behaviors depends on early neurogenesis.

## MATERIALS AND METHODS

### Zebrafish strains

Embryos were raised at 28.5°C in water containing 0.003% 1-phenyl-2-thiourea (PTU) and staged as described by Kimmel et al. (Kimmel et al., 1995). *huc:kaede;p2x3b:egfp* and *huc:kaede;trpa1b:egfp* embryos were generated by breeding homozygous adults. *neurogenin1*<sup>hi1059</sup> homozygous embryos were generated by inbreeding heterozygous adults and identified by their touch insensitivity at 24 hpf.

### Whole-mount in situ hybridization and antibody staining

The zebrafish *trpv1* cDNA was generated by performing RT-PCR with Superscript II (Invitrogen) using primers based on the sequence from 5' and 3' RACE (FirstChoice RLM-RACE, Ambion) and Ensembl exon predictions. Full-length sequence has been deposited in GenBank under accession number EU423314. The *huc* cDNA was obtained from GenBank (accession number AI959250); the *p2x3a* cDNA was obtained from the Seguela laboratory (Kucenas et al., 2006) and the *p2x3b* cDNA was obtained from the Voigt laboratory (Boue-Grabot et al., 2000). Preparation of RNA probes and in situ hybridization were performed as described previously (Ober and Schulte-Merker, 1999). RNA probes against *trpa1b*, *trpv1*, *p2x3a*, *p2x3b* and *huc* were labeled with DIG (Roche) and detected with an anti-DIG antibody (Roche) using NBT/BCIP (Roche). Immunohistochemistry was performed as described (Trevarrow et al., 1990). Antibodies against HuC (Molecular Probe) and HNK-1 were diluted 1:500 and detected using an anti-mouse antibody conjugated to HRP (Jackson Immunolab) and the Cy3-tyramide system (NEN Life Science). Antibodies against phosphohistone H3 (Upstate) were diluted 1:250 and detected using an anti-rabbit antibody conjugated to FITC (Jackson Immunolab).

### Morpholino injections

*neurogenin1* morphants were generated by injection of 6 ng of *neurogenin1* morpholino (5'-cgatgccattgttgataaccta-3') (Genetools) at the one-cell stage.

### BrdU birthdating analysis

Embryos aged between 24 hpf and 92 hpf were anesthetized with Tricaine (Sigma) and immobilized on a plate of 3% agarose. BrdU 100 mM (5 µl; Sigma) was injected into the brain ventricle. Injected embryos were allowed to develop until 96 hpf when they were fixed with 4% paraformaldehyde (Sigma). Embryos were permeabilized with proteinase K (30 mg/ml; Sigma) and stained using antibodies against HuC (Molecular Probes) and BrdU (Becton-Dickinson). HuC was revealed by an anti-mouse IgG2kb antibody coupled with horseradish peroxidase using the tyramide amplification system (Cy3) (NEN Life Science). Embryos were then treated for 1 hour with 2 M HCl to expose the incorporated BrdU. BrdU antibody was revealed by an anti-mouse IgG1 antibody coupled to HRP (Vector Laboratories) using the tyramide amplification system (FITC) (NEN Life Science). Embryos were mounted in 0.3% agarose and imaged with a Pascal confocal microscope using a 40× water immersion objective (Zeiss). Double labeling for BrdU and HuC was used to identify neurons that were born after BrdU injection. The average of neurons born after a specific time point was obtained by adding the number of double-labeled neurons detected in each ganglion divided by the total number of ganglia analyzed. The average of neurons born between 24 hpf and 72 hpf was obtained by adding the number of double-labeled neurons detected in each ganglion when BrdU was injected at 24, 28, 32, 36, 40, 44, 48, 52, 56, 60, 64 and 68 hpf divided by the total number of ganglia analyzed.

### BAPTISM and BAPTISM methods

For BAPTISM, fish homozygous for *huc:kaede* were used. For BAPTISM, *huc:kaede;p2x3b:egfp* and *trpa1b:egfp*; *huc:kaede* embryos were used. Embryos were mounted in 0.3% agarose. Kaede was converted from green to red fluorescence at 24 hpf by exposing the whole trigeminal sensory ganglion to 405 nm light for 1 minute. Embryos were allowed to develop until 72 hpf and imaged with a Pascal confocal inverted microscope using a 25× water immersion objective (Zeiss). For BAPTISM, a second

conversion was performed on the whole trigeminal sensory ganglion as described above and embryos were imaged again following the second conversion.

### Blocking cell proliferation

Wild-type and *neurogenin1* morphant embryos were incubated in a mixture of 2% DMSO, 20 mM hydroxyurea and 150 µM aphidicolin at 20 hpf, whereas mock-treated embryos were incubated in 2% DMSO alone. Embryos were stained using anti-phospho histone H3 antibody (Upstate) and HuC antibody (Molecular Probes). Primary antibodies were recognized using FITC-anti-rabbit and rhodamine-anti-mouse secondary antibodies.

### Behavioral assays

Zebrafish larvae were placed into a 10 cm diameter well dish. The touch assay was carried out by poking the embryo on its face with a glass needle. Response was scored as positive if the fish escaped following touch. Allyl isothiocyanate (mustard oil) (Sigma) was diluted in DMSO (1:100) and was delivered by gently streaming liquid out of an injection needle onto the face of the larva. The flow was adjusted so that the fish would not respond to an equivalent dose of DMSO.

## RESULTS

### Continuous neurogenesis in the zebrafish trigeminal sensory ganglia

The birthdate of a neuron refers to the time point at which a precursor undergoes its last division before differentiating as a neuron. HuC is expressed in differentiating neurons of vertebrates shortly after their birth (Marusich et al., 1994). To study the temporal pattern of neurogenesis in the trigeminal sensory ganglion in zebrafish, we first analyzed the expression of the zebrafish homologue of HuC (Kim et al., 1996). *huc* mRNA highlighted the first differentiated trigeminal neurons at 11 hours post fertilization (hpf) on each side of the head (Fig. 1B). Each ganglion contained 14±2 neurons (Fig. 1D). By the time the trigeminal sensory ganglia are responsive to external stimuli (24 hpf), each ganglion contained an average of 31±1 neurons (Fig. 1C,D). To follow the development of the trigeminal sensory ganglia at later stages, we used a transgene that expressed the fluorescent protein Kaede under the control of the *huc* promoter (Sato et al., 2006). We found that at 24 hpf each trigeminal sensory ganglion had an average size of 37±3 neurons and by 72 hpf reached an average size of 53±6 neurons (Table 1; Fig. 2B; Fig. 6A; see Movie 3 in the supplementary material). To gain further insight into the temporal pattern of trigeminal neurogenesis after 24 hpf, we used 5-bromo-2-deoxyuridine (BrdU) incorporation. Between 24 hpf and 92 hpf, a single injection of BrdU was given per embryo. The time points for injection were separated by 4-hour intervals, because BrdU remained available for incorporation for about 4 hours after injection (see Fig. S1 in the supplementary material). At 96 hpf, double labeling for BrdU and HuC was used to identify neurons that were born before or after BrdU injection (Fig. 1E; see Movie 1 in the supplementary material). This analysis revealed that new trigeminal neurons arose continuously from 24 hpf to 96 hpf (Fig. 1G). The number of new neurons added to a single ganglion per 4-hour interval ranged from one to eight with an average of 2.03±0.48 neurons. This rate of neurogenesis leads to an estimated addition of 23±4 neurons per ganglion from 24 hpf to 72 hpf, consistent with the increase of HuC-expressing neurons from 37±3 at 24 hpf to 53±6 at 72 hpf (Table 1; Fig. 2B; Fig. 6A; see Movie 3 in the supplementary material). Taken together, our analysis indicates that neurogenesis in trigeminal sensory ganglia consists of an early burst shortly after 11 hpf and a continuous slower phase after 24 hpf. We refer to trigeminal sensory neurons born before and after 24 hpf as early-born and late-born neurons, respectively.

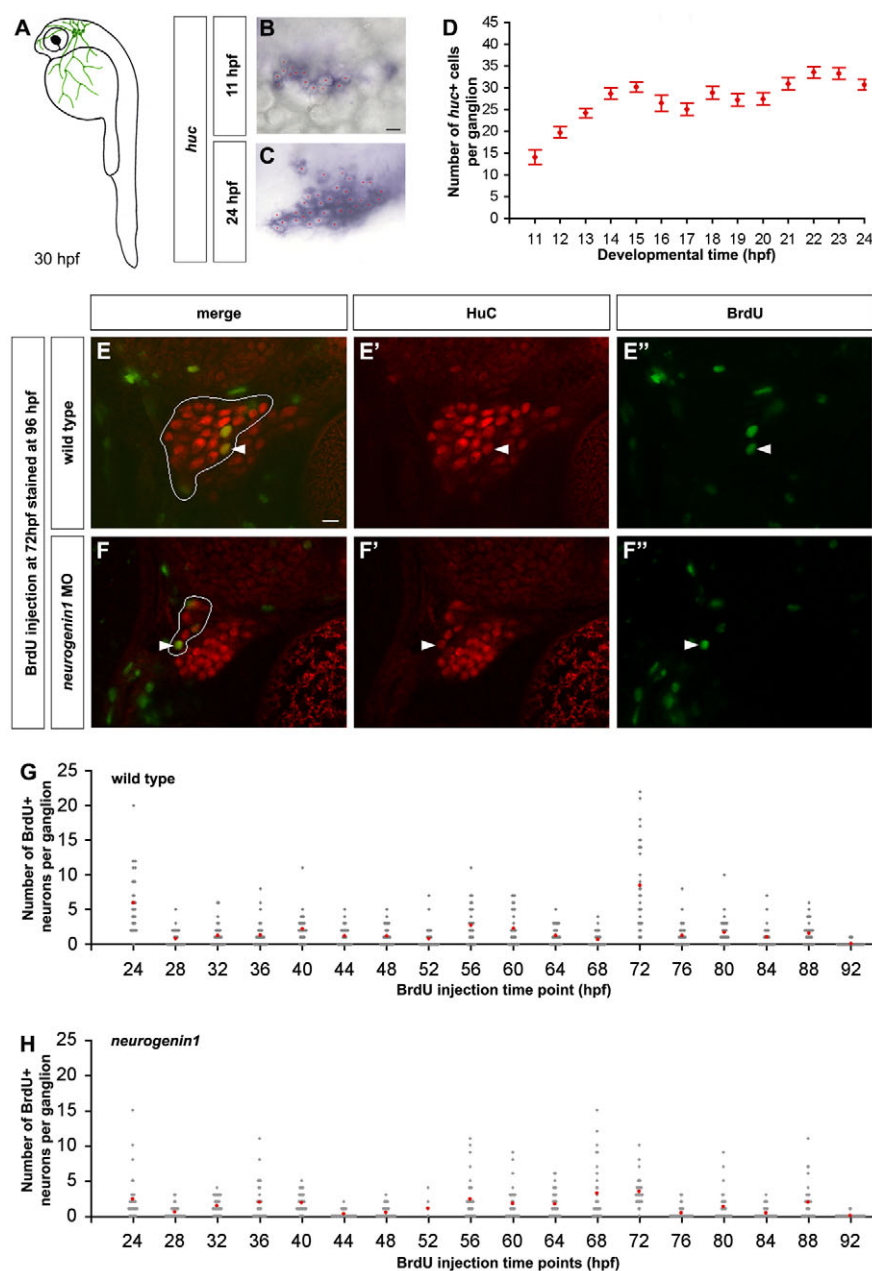

**Fig. 1. Continuous neurogenesis in the zebrafish trigeminal sensory ganglia.** (A) As schematized in a 30 hpf zebrafish embryo, the trigeminal sensory ganglia (green) are located on each side of the head posterior to the eyes. Trigeminal sensory neurons innervate the head and part of the yolk. (B–D) Wild-type embryos were hybridized with a *huc* antisense probe to count the number of trigeminal sensory neurons per ganglion. The first neurons appear at 11 hpf forming small clusters (B). During subsequent development, the number of neurons per ganglion increases (C). Side view, anterior towards the left; red asterisks label single neurons. Scale bar: 10  $\mu$ m. The graph represents the average number of neurons per ganglion at different developmental stages ranging from 11 hpf to 24 hpf (D). An individual ganglion contains an average of 14 neurons at 11 hpf and reaches an average size of 30 neurons at 24 hpf. Error bars indicate s.e.m. ( $n=15$ ). (E–H) To measure the number of neurons added to the trigeminal sensory ganglion after 24 hpf, embryos were injected once with BrdU, fixed at 96 hpf and immunostained for HuC (red) and BrdU (green). Double labeled cells in the trigeminal sensory ganglia of wild-type (E) or *neurogenin1* morphant (F) embryos injected with BrdU at 72 hpf are indicated with a white arrowhead. Side view, anterior towards the left; white outline delimits the trigeminal sensory ganglion from the anterior lateral line. Scale bar: 10  $\mu$ m. The graphs represent the number of neurons per ganglion born after the BrdU injection time point in wild-type (G) and *neurogenin1* morphant (H) embryos. Injections were performed at different times ranging from 24 hpf to 92 hpf. Gray dots represent individual samples and red dots represent the average number of BrdU-positive trigeminal sensory neurons found per ganglion at each injection time point ( $n=30$ ).

### In vivo birthdating of trigeminal sensory neurons

To distinguish early-born from late-born neurons in live embryos, we devised a method called BAPT1 (birthdating analysis by photoconverted fluorescent protein tracing in vivo) (Fig. 2A). In this method, we used the photoconvertible fluorescent protein Kaede. Upon exposure to ultraviolet light (405 nm) Kaede is permanently cleaved, and its emission spectrum shifts from green to red (Ando et al., 2002). The converted Kaede remains stable for several days (Hatta et al., 2006; Kimura et al., 2006). To specifically label early-born trigeminal sensory neurons, Kaede was photoconverted at 24 hpf in transgenic embryos expressing Kaede under the control of  $\sim 6$  kb of *huc* cis-regulatory region (*huc:kaede*) (Sato et al., 2006). This resulted in the red-fluorescent labeling of neurons born before 24 hpf. At 72 hpf, these early-born trigeminal sensory neurons were still evident by expression of the converted, red-fluorescent Kaede (*huc:kaede*<sup>red</sup>) (Fig. 2B, white arrows). Because the *huc:kaede* transgene continues to be

expressed in these neurons, they also expressed de novo synthesized unconverted green-fluorescent Kaede (*huc:kaede*<sup>red</sup> + *huc:kaede*<sup>green</sup>) (Fig. 2B, white arrows). By contrast, neurons born after 24 hpf did not contain converted red-fluorescent Kaede but only contained the unconverted green-fluorescent Kaede (*huc:kaede*<sup>green</sup>) (Fig. 2B, white arrowheads). Our analysis confirmed the presence of early-born and late-born neurons in the trigeminal sensory ganglia of 72 hpf zebrafish embryos. Of the  $53 \pm 6$  neurons per ganglion present at 72 hpf (Table 1; Fig. 2B; see Movie 3 in the supplementary material),  $35 \pm 4$  were born before 24 hpf (Table 1; Fig. 2B, white arrows; see Movie 3 in the supplementary material), whereas  $18 \pm 3$  neurons were added after 24 hpf (Table 1; Fig. 2B, white arrowheads; see Movie 3 in the supplementary material). These results are consistent with the observations that each ganglion contains  $37 \pm 3$  *huc:kaede*-expressing neurons at 24 hpf (Table 1; Fig. 6A) and that  $23 \pm 4$  neurons are added per ganglion based on BrdU labeling (Fig. 1G).



Table 1. Neurons forming the trigeminal sensory ganglia

| Conditions                      | Stage  | <i>huc:kaede</i>                                                  | <i>p2x3b:egfp</i>                                                | <i>trpa1b:egfp</i>                                             |
|---------------------------------|--------|-------------------------------------------------------------------|------------------------------------------------------------------|----------------------------------------------------------------|
| Wild type                       | 24 hpf | 37±3 (n=5)                                                        | 15±2 (n=11)                                                      | 20±3 (n=5)                                                     |
|                                 | 72 hpf | 53±6 (n=5)<br>Early-born neurons: 35±4<br>Late-born neurons: 18±3 | 17±2 (n=7)<br>Early-born neurons: 14±1<br>Late-born neurons: 3±1 | 13±2 (n=7)<br>Early-born neurons: 13±2<br>Late-born neurons: 0 |
| +Anti-proliferative drugs       | 72 hpf | 34±3 (n=11)<br>Early-born neurons: 32±3<br>Late-born neurons: 3±1 | 17±3 (n=5)<br>Mock treated: 18±1 (n=3)                           | 20±1 (n=5)<br>Mock treated: 24±3 (n=3)                         |
| + <i>neurogenin1</i> morpholino | 72 hpf | 15±2 (n=8)                                                        | 8±2 (n=3)                                                        | 0 (n=11)                                                       |

Neurons expressing *huc:kaede*, *p2x3b:egfp* and/or *trpa1b:egfp* transgenes were counted in 24 hpf and 72 hpf embryos. The BAPTISM technique was used to distinguish early-born neurons from late-born neurons at 72 hpf. The averages reported in the table represent the number of neurons per ganglion expressing a particular transgene in wild-type embryos, embryos treated with anti-proliferation drugs or *neurogenin1* morphant embryos. The standard error and sample size are indicated.

BAPTISM thus supports and extends the findings obtained using BrdU and makes it possible to analyze the temporal dynamics of neurogenesis in living zebrafish embryos.

Late-born neurons have restricted fates

To determine whether the specification of trigeminal sensory neurons is linked to their birthdates, we assessed the fates of early-born and late-born trigeminal sensory neurons. To this end, we combined reporter transgenes with the BAPTISM method (BAPTISM combined with Subpopulation Markers or BAPTISM) (Fig. 3A). In this approach, specific cell types within trigeminal sensory ganglia are labeled by EGFP expression under the control of cis-regulatory regions of different subpopulation markers (*subpopulation:egfp*). As shown in Fig. 3, in embryos carrying the *huc:kaede* transgene as well as a *subpopulation:egfp* transgene, trigeminal sensory neurons will, depending on their subtype, express either *huc:kaede* alone or both *huc:kaede* and *subpopulation:egfp*. They will, thus, be uniformly green (*huc:kaede<sup>green</sup>* or *huc:kaede<sup>green</sup>* + *subpopulation:egfp<sup>green</sup>*). When early-born neurons are labeled red by photoconversion of Kaede at 24 hpf, neurons that express the subpopulation marker will be both red and green (or yellow in merged images) (*huc:kaede<sup>red</sup>* + *subpopulation:egfp<sup>green</sup>*). By contrast, neurons that do not express the subpopulation marker will be red but not green (*huc:kaede<sup>red</sup>*). When the same embryos are analyzed at 72 hpf, early-born neurons will have retained the converted red-fluorescent Kaede but will also express unconverted green-fluorescent Kaede (*huc:kaede<sup>red</sup>* + *huc:kaede<sup>green</sup>* or *huc:kaede<sup>red</sup>* + *huc:kaede<sup>green</sup>* + *subpopulation:egfp<sup>green</sup>*) and will, thus, be both red and green. By contrast, late-born neurons will, at that stage, express only non-converted green Kaede (*huc:kaede<sup>green</sup>* or *huc:kaede<sup>green</sup>* + *subpopulation:egfp<sup>green</sup>*) and thus be green. To distinguish the late-born neurons that express the subpopulation marker (*huc:kaede<sup>green</sup>* + *subpopulation:egfp<sup>green</sup>*) from the ones that do not (*huc:kaede<sup>green</sup>*), a second conversion is performed at 72 hpf. Following this second conversion, both early-born and late-born neurons will contain converted red-fluorescent Kaede (*huc:kaede<sup>red</sup>*) but only those neurons that also express *subpopulation:egfp* will retain green fluorescence (*huc:kaede<sup>red</sup>* + *subpopulation:egfp<sup>green</sup>*). Direct comparison of individual neurons before and after the second conversion will therefore reveal whether a given subpopulation marker is expressed in an early-born and/or a late-born neuron (Fig. 3B). BAPTISM thus can be used to identify simultaneously in vivo both the birthdate of a neuron and its fate.

We applied BAPTISM to investigate whether early-born and late-born neurons contribute to different subpopulations of trigeminal sensory neurons. We focused on two subpopulations of neurons: those expressing *trpa1b* and those expressing *p2x3b*. Both genes are expressed in the trigeminal sensory ganglia of zebrafish starting at

24 hpf (Kucenas et al., 2006) (D.P. and A.F.S., unpublished). We used transgenic zebrafish expressing EGFP under the control of the cis-regulatory regions of *p2x3b* or *trpa1b*. Both transgenes reflect the expression patterns of the endogenous genes (Kucenas et al., 2006) (M.C. and A.F.S., unpublished). BAPTISM analysis of embryos carrying the *p2x3b:egfp* transgene revealed that both early-born and late-born neurons contributed to the *p2x3b*-expressing subpopulation (Fig. 4A,B, green arrows and arrowheads) (see Movies 4 and 5 in the supplementary material). Per ganglion, 14±1 *p2x3b*-expressing neurons were derived from early-born neurons, and 3±1 *p2x3b*-expressing neurons were derived from late-born neurons (Table 1; Fig. 4A,B,E, green arrows and arrowheads) (see Movies 4 and 5 in the supplementary material). This indicated that

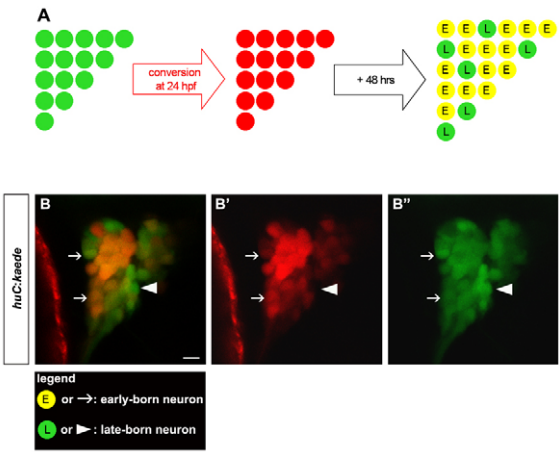

Fig. 2. In vivo birthdating analysis of trigeminal sensory neurons using BAPTISM. Embryos carrying the *huc:kaede* transgene were analyzed using the birthdating analysis by photoconverted fluorescent protein tracing in vivo method (BAPTISM). (A) As schematized, the trigeminal sensory neurons initially appear green. Following illumination of 24 hpf embryos with ultraviolet light, *huc:kaede<sup>green</sup>* is converted to *huc:kaede<sup>red</sup>* and all neurons born prior to 24 hpf appear red. After 48 hours incubation, neurons born before 24 hpf retain *huc:kaede<sup>red</sup>* and express *de novo huc:kaede<sup>green</sup>*, whereas neurons born after 24 hpf express only *huc:kaede<sup>green</sup>*. Early-born neurons (E) appear red and green (yellow); late-born (L) neurons appear green only. (B) Converted embryos were imaged at 72 hpf. Early-born neurons are identifiable by their red and green signals (arrow), whereas late-born neurons are identifiable by their green only signal (arrowhead). Neurons with weak (top arrow) or strong red signals (bottom arrow) were counted as early-born neurons. The entire trigeminal sensory ganglion was imaged by confocal microscopy. At this plane of confocal section only one late-born neuron is visible (arrowhead). Side view, anterior towards the left. Scale bar: 10 µm.

**Fig. 3. Simultaneous in vivo analysis of trigeminal sensory neuron birthdate and fate using BAPTISM.** Embryos carrying the *huc:kaede* transgene together with a subpopulation: *egfp* transgene were analyzed using the birthdating analysis by photoconverted fluorescent protein tracing in vivo method combined with a subpopulation marker (BAPTISM). (A) As schematized, the trigeminal sensory neurons initially appear all green (*huc:kaede<sup>green</sup>* or *huc:kaede<sup>green</sup>* + *subpopulation:egfp<sup>green</sup>*). Following a first conversion at 24 hpf, early-born neurons are labeled red and those neurons that express the subpopulation marker appear red and green (yellow) (*huc:kaede<sup>red</sup>* + *subpopulation:egfp<sup>green</sup>*), whereas neurons that do not express the subpopulation marker appear red only (*huc:kaede<sup>red</sup>*). After a 48-hour incubation, early-born neurons retain the converted, red-fluorescent Kaede but also express de novo unconverted green-fluorescent Kaede (*huc:kaede<sup>red</sup>* + *huc:kaede<sup>green</sup>* or *huc:kaede<sup>red</sup>* + *huc:kaede<sup>green</sup>* + *subpopulation:egfp<sup>green</sup>*). Late-born neurons express non-converted green Kaede (*huc:kaede<sup>green</sup>* or *huc:kaede<sup>green</sup>* + *subpopulation:egfp<sup>green</sup>*). After a second conversion at 72 hpf, both early-born and late-born neurons contain red-fluorescent converted Kaede (*huc:kaede<sup>red</sup>*) and only those neurons that also express the subpopulation transgene retain green fluorescence (*huc:kaede<sup>red</sup>* + *subpopulation:egfp<sup>green</sup>*) (yellow). (B) Comparison of the signals in single neurons before and after the second conversion reveal whether a given subpopulation marker is expressed in an early-born and/or a late-born neuron. Early born neurons appear yellow before the second conversion whereas late-born neurons appear green only. Trigeminal neurons that express the subpopulation marker (subpopulation+) appear yellow after the second conversion, whereas the ones that do not express it appear red only (subpopulation-).

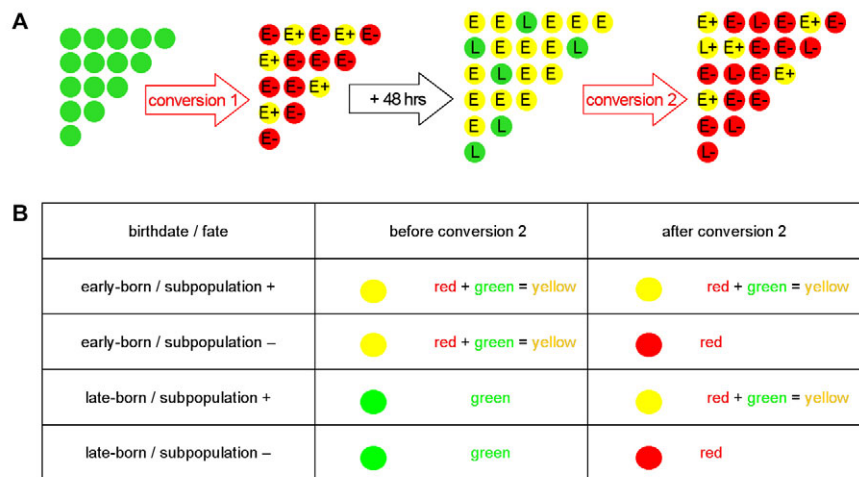

both early-born and late-born neurons have the potential to form *p2x3b*-expressing neurons. The specification of the *p2x3b*-expressing subpopulation of trigeminal sensory neurons therefore appears to be determined independently of birthdate. BAPTISM analysis of *trpa1b:egfp*-expressing embryos revealed that early-born neurons contributed to the *trpa1b*-expressing neurons (Fig. 4C,D,E green arrows) (see Movies 6 and 7 in the supplementary material). Per ganglion,  $13 \pm 2$  *trpa1b*-expressing neurons were derived from early-born neurons (Table 1; Fig. 4C,D,E, green arrows; see Movies 6 and 7 in the supplementary material). By contrast, none of the late-born neurons expressed *trpa1b* (Fig. 4C-E, white arrowheads; see Movies 6 and 7 in the supplementary material). Of the 132 late-born neurons analyzed in seven *huc:kaede;trpa1b:egfp* embryos, none expressed *trpa1b:egfp* (Table 1; Fig. 4C-E; see Movies 6 and 7 in the supplementary material). This indicates that *trpa1b*-expressing neurons are exclusively formed from early-born neurons, and that late-born neurons do not contribute to this subset of trigeminal sensory neurons. These results suggest that early-born neurons are competent to form both *trpa1b*-expressing and *p2x3b*-expressing neurons, whereas late-born neurons are restricted in their cell type specification.

### Independent specification of early-born and late-born neurons

The results described above reveal that early-born neurons persist in trigeminal sensory ganglia and that late-born neurons are restricted in their fate. In principle, the development of early-born neurons could be influenced by the presence of late-born neurons and vice versa. For example, the differentiation of early-born neurons might restrict the fate of late-born neurons, and late-born neurons might be required for the maintenance of early-born neurons. To test these models, we generated embryos whose trigeminal sensory ganglia contained only early-born or only late-born neurons, and determined whether these ganglia expressed *p2x3b* and *trpa1b*.

To create embryos that lacked late-born neurons, we blocked cell proliferation after 24 hpf by treating embryos with anti-proliferative drugs (Lyons et al., 2005). Phospho-histone H3 labeling indicated that treated embryos displayed a strong reduction of mitotic cells (Fig. 6H,J). To further analyze the formation and survival of neurons after treatment, BAPTISM was used to label neurons at 24 hpf (see Fig. S2 in the supplementary material). At 72 hpf, treated embryos contained  $32 \pm 3$  early-born neurons (*huc:kaede<sup>red</sup>*) and only  $3 \pm 1$  late-born neurons (*huc:kaede<sup>green</sup>*) (for a total of  $34 \pm 3$  neurons), as opposed to  $35 \pm 4$  early-born neurons and  $18 \pm 3$  late-born neurons (for a total of  $53 \pm 6$  neurons) in mock-treated embryos (Table 1; see Fig. S2 in the supplementary material). These results reveal that anti-proliferation treatment does not affect the survival of early-born neurons but strongly reduces the formation of late-born neurons. Trigeminal sensory ganglia consisting of early-born neurons still expressed *p2x3b*, *p2x3b:egfp*, *trpa1b* and *trpa1b:egfp* (Fig. 5B,D,F,H). Similar to untreated embryos, treated embryos contained  $17 \pm 3$  *p2x3b:egfp*-expressing neurons and  $20 \pm 1$  *trpa1b-GFP*-expressing neurons (Table 1; Fig. 5A-D). In addition, we detected mRNA expression of other trigeminal subpopulation markers such as the thermally gated channel TrpV1 and the second P2X3 homologue P2X3a (see Fig. S3 in the supplementary material). These results indicate that late-born neurons are required neither for the maintenance nor subspecification of early-born neurons.

BAPTISM indicated that in contrast to early-born neurons, late-born neurons did not generate *trpa1b*-expressing neurons (Fig. 4E). To test whether this restriction is imposed on the late-born neurons by the presence of early-born neurons, we specifically removed early-born neurons from the trigeminal ganglia. Zebrafish embryos that lack the transcriptional regulator *neurogenin1* lack trigeminal sensory ganglia at 24 hpf (Fig. 6B) (Andermann et al., 2002; Cornell and Eisen, 2002; Golling et al., 2002). We discovered, however, that *neurogenin1* mutants and *neurogenin1* morphants (antisense morpholino-injected embryos) formed trigeminal sensory ganglia at

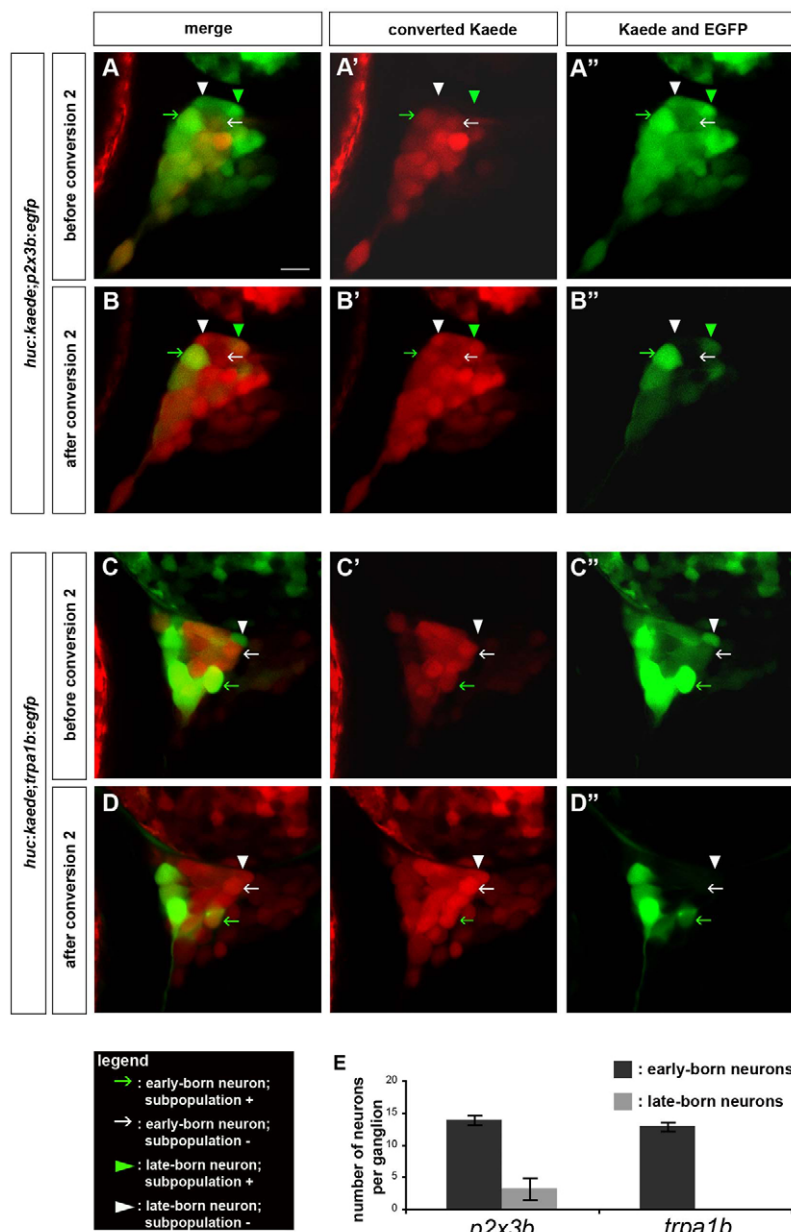

**Fig. 4. Late-born but not early-born neurons are restricted in their fate.** Embryos carrying the *huc:kaede* transgene, together with either the *p2x3b:egfp* or the *trpa1b:egfp* transgene were analyzed using BAPTISM. (A–D) *huc:kaede* was first converted at 24 hpf, imaged at 72 hpf (A,C) and converted a second time (B,D). (A,B) In *huc:kaede;p2x3b:egfp* embryos, early-born neurons either express the subpopulation marker (green arrow) or do not (white arrow), and late-born neurons either express the subpopulation marker (green arrowhead) or do not (white arrowhead). (C,D) In *huc:kaede;trpa1b:egfp* embryos, early-born neurons either express the subpopulation marker (green arrow) or do not (white arrow). Late-born neurons do not express the subpopulation marker (white arrowhead). Side view, anterior towards the left. Scale bar: 10  $\mu$ m. (E) The histogram represents the number of neurons per trigeminal sensory ganglion expressing the *p2x3b* or *trpa1b* subpopulation markers derived from either early-born neurons (dark gray) or late-born neurons (light gray). The error bars refer to the s.e.m. ( $n=7$ ).

later stages of development (Fig. 6D,F,G). In *neurogenin1*-depleted embryos, the first *huc*-expressing trigeminal sensory neurons appeared around 48 hpf (data not shown). By 96 hpf, trigeminal ganglia contained fewer neurons than wild-type ganglia but formed the typical three branched pattern (Fig. 6C–G).

To test whether the ganglia in *neurogenin1* morphants were formed by late-born neurons, we performed BrdU labeling experiments. A time course of BrdU injections in *neurogenin1* morphants revealed that, as in wild type, late-born neurons emerged continuously after 24 hpf (Fig. 1F,H; see Movie 2 in the supplementary material). To determine whether delayed differentiation of early-born neurons might also contribute to the later emergence of trigeminal sensory neurons, we eliminated the late-born neurons from *neurogenin1* morphants using the anti-proliferation treatment described above. No trigeminal sensory neurons were detected in treated *neurogenin1* morphants at 72 hpf (Fig. 6K), confirming that late neurogenesis is the major source of neurons in the absence of *neurogenin1*.

To directly visualize the formation of late-born neurons in the absence of *neurogenin1*, we injected *neurogenin1* morpholinos into *huc:kaede* embryos. Morphants had  $15 \pm 2$  neurons per ganglion at 72 hpf, compared with  $53 \pm 6$  neurons in wild type (Table 1; Fig. 2B and data not shown; see Movie 3 in the supplementary material). Consistent with late neurogenesis in *neurogenin1* morphants, the number of neurons in *neurogenin1*-depleted embryos is comparable with the number of late-born neurons in wild-type embryos based on BrdU labeling ( $23 \pm 4$  neurons per ganglion) (Fig. 1G) or BAPTISM ( $18 \pm 3$  neurons per ganglion) (Table 1; Fig. 2B; see Movie 3 in the supplementary material). These results suggest that the trigeminal sensory ganglia of *neurogenin1*-depleted embryos are solely formed from late-born neurons.

To test whether early-born neurons restrict the fate of late-born neurons, we injected *neurogenin1* morpholinos into *p2x3b:egfp* and *trpa1b:egfp* embryos. Morphants had  $8 \pm 2$  *p2x3b:egfp*-expressing neurons per ganglion but no *trpa1b:egfp*-expressing neurons could be detected (Table 1; Fig. 7B,D). *neurogenin1* morphants expressed



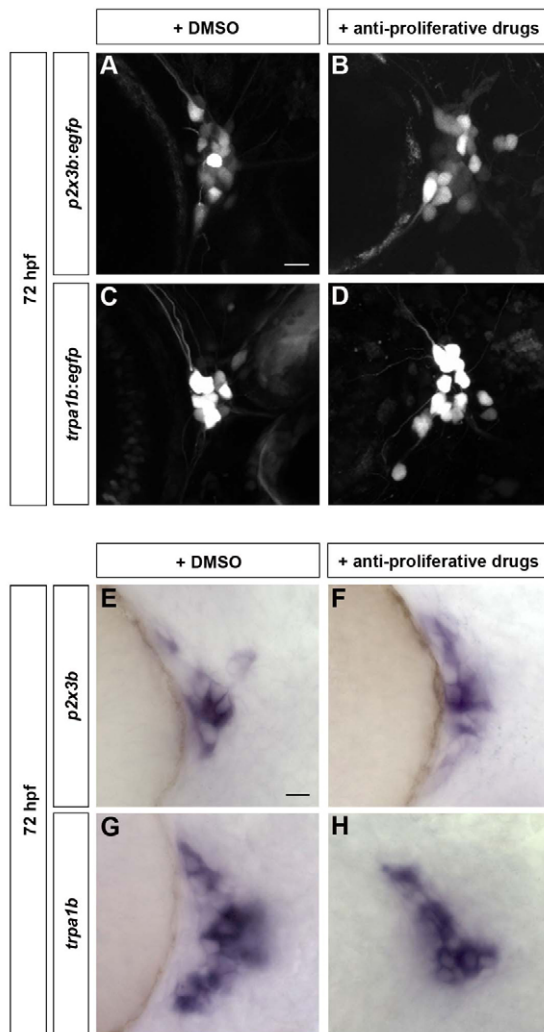

**Fig. 5. Early-born trigeminal sensory neurons contribute to various subpopulations independently of late-born neurons.** Subpopulation markers were analyzed in embryos lacking late-born trigeminal sensory neurons. (A-H) Embryos were incubated from 24 hpf to 72 hpf with 2% DMSO alone (A,C,E,G) or 20 mM hydroxyurea and 150 μM aphidicolin (B,D,F,H). Embryos carrying the *p2x3b:egfp* (A,B) or *trpa1b:egfp* (C,D) transgene were imaged at 72 hpf. Wild-type embryos were fixed at 72 hpf and in situ hybridization was performed for *p2x3b* (E,F) and *trpa1b* (G,H). Side view, anterior towards the left. Scale bars: 10 μm.

*trpv1*, *p2x3a* and *p2x3b* mRNAs (Fig. 7F; see Fig. S4 in the supplementary material) but not *trpa1b* (Fig. 7H), consistent with our previous findings. These results indicate that the cell fate restriction of late-born trigeminal neurons can occur independently of early-born neurons.

### Birthdate affects the chemical sensitivity of trigeminal sensory ganglia

The finding that early neurogenesis is required for the formation of *trpa1b*-expressing neurons raised the possibility that birthdate might also underlie the function of trigeminal sensory ganglia at a behavioral level. The TrpA1b channel is required for the detection of chemical irritants such as allyl isothiocyanate in mouse (Bandell et al., 2004; Jordt et al., 2004) and zebrafish (D.P. and A.F.S.,

unpublished) but is not needed for mechanosensation (Bautista et al., 2006; Kwan et al., 2006). These studies raised the hypothesis that only embryos containing early-born neurons would respond to allyl isothiocyanate. Indeed, we found that touch and allyl isothiocyanate elicited an escape response in wild-type larvae and in larvae with only early-born trigeminal sensory neurons (Table 2; see Movies 8 and 9 in the supplementary material). By contrast, *neurogenin1*-depleted embryos were completely insensitive to allyl isothiocyanate at all stages tested from 24 hpf to 192 hpf, despite the presence of late-born trigeminal sensory neurons (Table 2; see Fig. S5 and Movie 9 in the supplementary material). *neurogenin1* mutants did not respond to touch at 24 hpf, consistent with the complete absence of trigeminal sensory neurons at this stage (Table 2; Fig. 6B), but touch response became apparent around 48 hpf and was fully restored by 96 hpf, concomitant with the formation of late-born trigeminal sensory neurons (Table 2; Fig. 6F,G; see Fig. S5 and Movie 9 in the supplementary material). These results suggest that early neurogenesis is required not only for the formation of a specific type of chemosensory trigeminal neurons but also for the establishment of associated behaviors.

### DISCUSSION

#### Early neurogenesis is sufficient for establishment of multimodal sensing in trigeminal sensory ganglia

Neurogenesis of zebrafish trigeminal sensory ganglia initiates with a burst at 11 hpf, resulting in the generation of ~30 neurons by 24 hpf. At later stages trigeminal sensory ganglia grow continuously but at a slower rate to form ~55 neurons by 72 hpf. Our study reveals that a subpopulation of chemosensory neurons expressing the nociceptive channel TrpA1b forms exclusively during the early phase of zebrafish neurogenesis (Fig. 8). Two lines of evidence support this conclusion. First, in vivo labeling using BAPTISM reveals that TrpA1b-expressing neurons form exclusively from early-born neurons. Second, removal of early-born neurons results in the absence of TrpA1b cells and abrogates the larval escape behavior triggered by the TrpA1b agonist allyl isothiocyanate. In contrast to TrpA1b neurons, mechanosensory and P2X3b neurons develop from both early-born and late-born neurons.

Different waves of neurogenesis have also been implicated in the cell type diversification of mouse DRGs, but, in contrast to the zebrafish trigeminal ganglion, nociceptive DRG neurons do only derive from the second and third wave of neurogenesis. It is conceivable that these apparent differences might be based on differences in marker analysis. For example, the birthdate of TrpA1b neurons has not been determined in mouse (Ma et al., 1999; Maro et al., 2004; Marmigere and Ernfor, 2007). In addition, lineage analysis in zebrafish will be required to determine whether late-born trigeminal neurons are derived from the cells analogous to the boundary cap cells responsible for the third wave of neurogenesis in the DRG (Marmigere and Ernfor, 2007).

Specific removal of late-born neurons does not affect the expression of TrpA1b, TrpV1, P2X3a and P2X3b, and the response to allyl isothiocyanate and touch. These findings do not exclude the possibility that more extensive gene expression profiling might identify sensory subtypes that cannot form from early-born neurons. It is unknown how many different neuronal subtypes reside in the zebrafish trigeminal ganglion. For example, studies in mouse have shown that TrpA1 neurons are contained within the TrpV1 population, indicating that these two markers label a TrpV1<sup>+</sup>;TrpA1<sup>+</sup> and a TrpV1<sup>+</sup>;TrpA1<sup>-</sup> subpopulation. Although similar studies have yet to be performed in zebrafish, our results

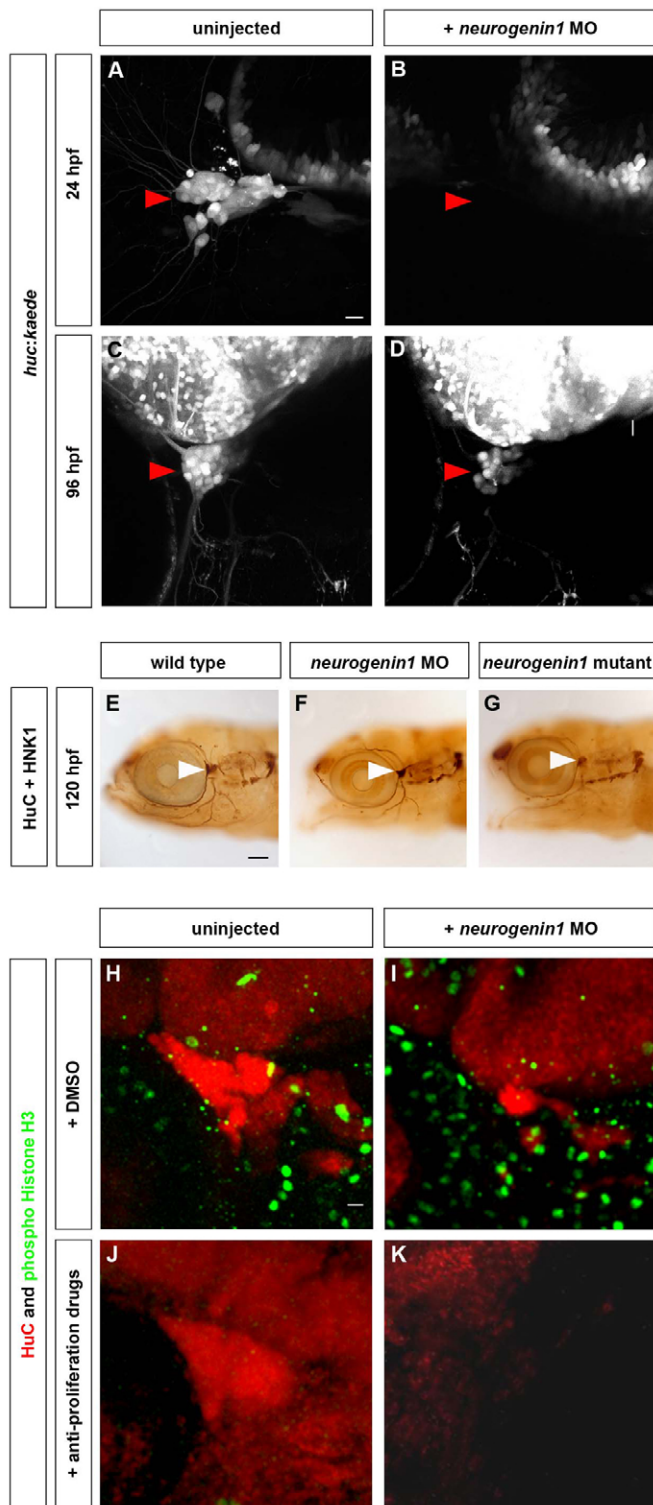

**Fig. 6. The trigeminal sensory ganglia of *neurogenin1* mutant and morphant embryos are solely formed from late-born neurons.** Neurogenin1-depleted embryos develop smaller trigeminal sensory ganglia formed from late-born neurons only. (A–D) Embryos carrying the *huc:kaede* transgene were injected with 6 ng of *neurogenin1* antisense morpholino (B,D) or uninjected (A,C). At 24 hpf, the trigeminal sensory ganglia are visible in uninjected embryos by the expression of Kaede (A,C) but no trigeminal sensory neurons are detectable in the *neurogenin1* morphants at 24 hpf (B). At 96 hpf, the trigeminal sensory ganglia are visible in *neurogenin1* morpholino-injected embryos (D) but contain fewer neurons than uninjected embryos (C). Side view, anterior towards the left. Scale bar: 10  $\mu$ m. (E–G) The morphology of the neurons of the trigeminal sensory ganglia was analyzed by immunostaining in wild-type (E), *neurogenin1* morphant (F) and *neurogenin1* mutant (G) embryos with HuC, a pan-neuronal marker, and HNK-1, a marker labeling the cell surface of sensory neurons. White arrowheads indicate the trigeminal sensory ganglia. Side view, anterior towards the left. Scale bar: 100  $\mu$ m. (H–K) To determine whether the trigeminal sensory ganglia in *neurogenin1* morphant embryos are partly formed from early-born neurons, embryos were treated with 2% DMSO alone (H,J) or with 20 mM hydroxyurea and 150  $\mu$ M aphidicolin (I,K) at 24 hpf. HuC staining (red) labels the trigeminal sensory ganglia. Staining for the mitotic marker phospho-histone H3 (green) was used to monitor the number of proliferating cells in the whole embryos. Proliferation was not affected in mock-treated embryos (H,J) but was significantly reduced in treated embryos (I,K). No trigeminal sensory neurons are detectable in the *neurogenin1* morphant embryos treated with the anti-proliferative drugs (K), in contrast to the mock-treated *neurogenin1* morphant (I) or wild-type embryos (H,J). Side view, anterior towards the left. Scale bar: 10  $\mu$ m.

mammalian cortical neurons forms during a defined time window, whereas multiple subpopulations of zebrafish trigeminal sensory neurons are generated in a short time interval. The latter strategy is well suited for the life history of zebrafish. Embryos develop externally, and larvae hatch and become free-living at about 48 hpf. Thus, functional sensory systems have to be in place early in development. This is particularly true for the trigeminal sensory ganglia and their vital function in the detection of noxious stimuli. Thus, the early neurogenesis and multimodal cell fate specification in this system allow for the rapid formation of a functional organ essential for survival in the wild.

#### Late neurogenesis contributes to some but not all subpopulations of trigeminal sensory neurons

Our findings indicate that late-born trigeminal sensory neurons of zebrafish are restricted in their fate and do not contribute to the subpopulation of chemosensory neurons expressing TrpA1b. Even in the absence of early-born neurons, late-born neurons fail to express TrpA1b and cannot mediate the response to the TrpA1b agonist allyl isothiocyanate. The cues that restrict the fate of late-born trigeminal sensory neurons are unknown. The lack of activating cues or the presence of inhibitory signals generated by surrounding cells might restrict fate specification at later stages of neurogenesis. The latter mechanism is found in the mammalian retina where amacrine cells, an early-born fate, inhibit the formation of additional amacrine cells (Belliveau and Cepko, 1999). Our results argue against a role of early-born trigeminal neurons as a source of inhibiting cues, because the absence of these cells in *neurogenin1* mutants does not alleviate the

indicate that early-born neurons can form a multimodal sensory ganglion independently of late-born neurons. This mode of rapid multimodal neuronal specification contrasts with the sequential patterning in systems such as the mammalian cortex. Mammalian cortical neurons are arranged in a laminar structure composed of six layers. Early-born neurons form the deep layer 6 and as development proceeds, newly born neurons populate increasingly superficial layers (for a review, see McConnell, 1995). Thus, each subset of



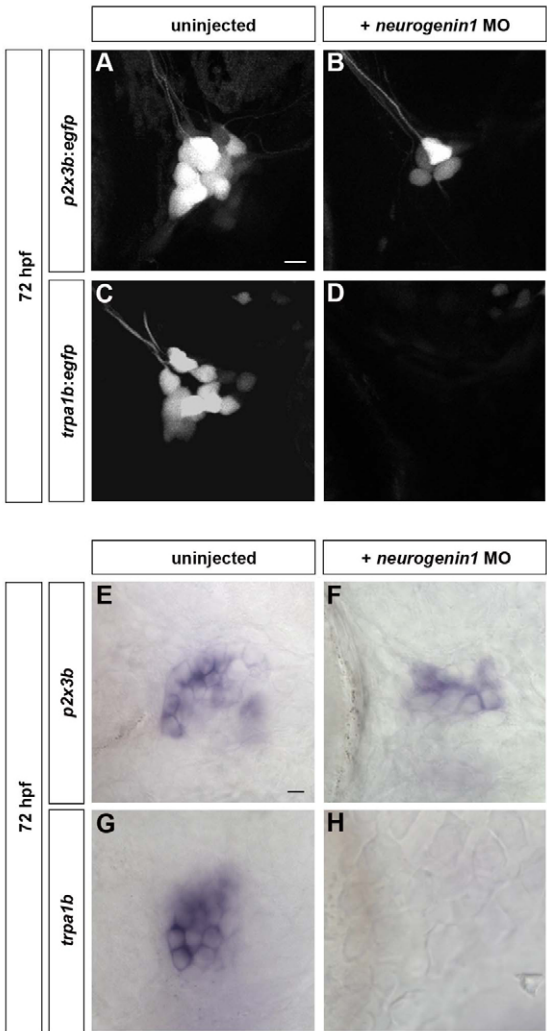

**Fig. 7. Cell fate restriction of late-born trigeminal sensory neurons is independent of early-born neurons.** Subpopulation markers were analyzed in embryos lacking early-born trigeminal sensory neurons. (A–D) Embryos carrying the *p2x3b:egfp* (A,B) or *trpa1b:egfp* (C,D) transgene were injected with 6 ng of *neurogenin1* morpholino (B,D) and imaged at 72 hpf. Although both *p2x3b*-expressing and *trpa1b*-expressing neurons are visible in uninjected larvae (A,C), only *p2x3b*-expressing are detectable in *neurogenin1* morphant larvae (B). No *trpa1b*-expressing neurons were detected in these larvae (D). (E–H) Wild-type (E,G) and *neurogenin1* morphant (F,H) larvae were stained by in situ hybridization at 96 hpf for *p2x3b* (E,F) or *trpa1b* (G,H). No *trpa1b*-expressing neurons were detected in *neurogenin1* morphant larvae (H). Side view, anterior towards the left. Scale bars: 10  $\mu$ m.

restriction of late-born neurons. Intrinsic timing mechanisms could contribute to progenitor restriction. Such a mechanism is observed in the mammalian cortex, where late cortical progenitors placed into a younger host fail to form the deep cortical neurons normally formed by early progenitors (for a review, see McConnell, 1995). A similar mechanism might account for the restriction of late-born trigeminal sensory neurons. Detailed

characterization of trigeminal sensory neuron progenitors is needed to determine whether extrinsic regulatory signals might arise from cells surrounding the trigeminal sensory neurons or whether intrinsic mechanisms restrict fate specification. Fate restriction during neurogenesis is thought to help generate the proper architecture and connectivity of neural circuits. It is conceivable that the location or connectivity of early-born and late-born trigeminal sensory neurons might reflect their functional diversification. Trigeminal sensory ganglia form a coarse topographic map along the anterior-posterior and dorsal-ventral axes (Sagasti et al., 2005). For example, neurons whose cell bodies are located in the anterior-dorsal region of the ganglion tend to innervate the anterior-dorsal region of the head. It is possible that there is a third, proximal-distal axis to this map. Late-born neurons are generally located in deeper cell layers of the ganglion than early-born neurons (see Fig. S6 in the supplementary material) and TrpA1b-expressing neurons are located more superficially (see Fig. S6 in the supplementary material). As detectors of external sources of noxious chemicals, TrpA1b-expressing neurons would need to project into superficial layers of the skin. It is possible that the location of early-born neurons in superficial regions of the ganglia might allow or force innervation of superficial regions of the skin. By contrast, deeper neurons might project more deeply and detect internal, potentially proprioceptive stimuli. Detailed comparisons of birth dates, cell types and peripheral axon projections are required to test this model.

**Table 2. Birthdate affects the sensory modalities of the trigeminal sensory ganglia**

|                                 | Day 1        | Day 2            | Day 3              | Day 4              | Day 5              | Day 6        | Day 7        | Day 8        |
|---------------------------------|--------------|------------------|--------------------|--------------------|--------------------|--------------|--------------|--------------|
| <b>Response to touch</b>        |              |                  |                    |                    |                    |              |              |              |
| Wild type                       | 100 $\pm$ 0% | 100 $\pm$ 0%     | 100 $\pm$ 0%       | 100 $\pm$ 0%       | 100 $\pm$ 0%       | 100 $\pm$ 0% | 100 $\pm$ 0% | 100 $\pm$ 0% |
| Anti-proliferation treatment    | 100 $\pm$ 0% | 100 $\pm$ 0%     | 100 $\pm$ 0%       | n/d                | n/d                | n/d          | n/d          | n/d          |
| <i>neurogenin1</i> (morpholino) | 0 $\pm$ 0%   | 15.00 $\pm$ 11%  | 65.00 $\pm$ 31.52% | 51.67 $\pm$ 28.95% | 81.82 $\pm$ 23.24% | 100 $\pm$ 0% | 100 $\pm$ 0% | 100 $\pm$ 0% |
| <i>neurogenin1</i> (mutant)     | 0 $\pm$ 0%   | 3.33 $\pm$ 2.25% | 41.67 $\pm$ 9.36%  | 66.67 $\pm$ 6.67%  | 76.67 $\pm$ 7.72%  | 100 $\pm$ 0% | 100 $\pm$ 0% | 100 $\pm$ 0% |
| <b>Response to mustard oil</b>  |              |                  |                    |                    |                    |              |              |              |
| Wild type                       | 100 $\pm$ 0% | 100 $\pm$ 0%     | 100 $\pm$ 0%       | 100 $\pm$ 0%       | 100 $\pm$ 0%       | 100 $\pm$ 0% | 100 $\pm$ 0% | 100 $\pm$ 0% |
| Anti-proliferation treatment    | 100 $\pm$ 0% | 100 $\pm$ 0%     | 100 $\pm$ 0%       | n/d                | n/d                | n/d          | n/d          | n/d          |
| <i>neurogenin1</i> (morpholino) | 0 $\pm$ 0%   | 0 $\pm$ 0%       | 0 $\pm$ 0%         | 0 $\pm$ 0%         | 0 $\pm$ 0%         | 0 $\pm$ 0%   | 0 $\pm$ 0%   | 0 $\pm$ 0%   |
| <i>neurogenin1</i> (mutant)     | 0 $\pm$ 0%   | 0 $\pm$ 0%       | 0 $\pm$ 0%         | 0 $\pm$ 0%         | 0 $\pm$ 0%         | 0 $\pm$ 0%   | 0 $\pm$ 0%   | 0 $\pm$ 0%   |

Wild-type, *neurogenin1* morphant and *neurogenin1* mutant zebrafish were tested for their response to touch and allyl isothiocyanate starting at 24 hpf (day 1) until 192 hpf (day 8). Touch stimuli were delivered by touching the head of the zebrafish with a glass needle. A solution of 1% allyl isothiocyanate was applied onto the head. Larvae were considered responsive if they instantaneously swam away from the source of the stimulus. On each day of development, individual zebrafish were tested five times and responsiveness was assessed as the percentage of time the animal reacted to the stimulus. The s.e. is indicated below each percentage ( $n=12$ ). Wild-type and *neurogenin1*-depleted 96 hpf larvae were responsive to touch, but only wild-type larvae were responsive to allyl isothiocyanate.

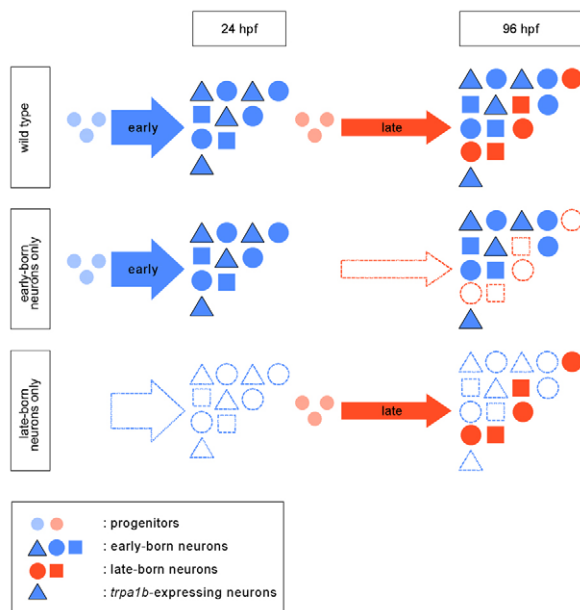

**Fig. 8. Model for the role of neurogenesis in forming trigeminal sensory ganglia in zebrafish.** The trigeminal sensory ganglia in wild-type embryos are formed from early-born neurons (born before 24 hpf) and late-born neurons (born after 24 hpf). In 96 hpf larvae, early-born neurons (blue triangles, squares and circles) are intermingled with late-born neurons (orange squares and circles). Early-born neurons contribute to all identified subpopulations of trigeminal sensory neurons, whereas late-born neurons fail to form the *trpa1b*-expressing subpopulation (blue triangles). When proliferation is blocked after 24 hpf, embryos lack late-born neurons.

### BAPTISM – a novel method to analyze birthdate and fate of neurons

Our study introduces a novel method, BAPTISM, for the in vivo analysis of the birthdate and fate of neurons. Conversion of the fluorescent protein Kaede serves as a marker to distinguish neurons born at different times. Birthdate is then correlated with fate by addition of non-convertible EGFP markers that label different neural subpopulations. BAPTISM has several advantages compared with more traditional birthdating techniques such as BrdU incorporation. First, BAPTISM can be used repeatedly throughout embryogenesis, unlike the more invasive BrdU injections that can damage cells and embryos. Second, BAPTISM labels neurons independently of their position in the cell cycle, whereas BrdU is only incorporated during S-phase. Third, BAPTISM is temporally precise, because labeling is instantaneous, whereas BrdU has to be taken up by cells and then remains available for several hours. Fourth, and most importantly, BAPTISM allows continuous in vivo observation: cells can be followed throughout development. By contrast, the visualization of BrdU-labeled cells is restricted to the single time point when the specimen is fixed. By using multiple spectrally distinct fluorescent proteins, BAPTISM can be extended to follow multiple subpopulations at once. Finally, this method can be adapted easily to study additional neuronal assemblies and other organs.

We thank the members of the Schier laboratory for discussion; Florian Maderspacher, Albert Pan, Jason Rihel, Nadine Vastenhouw and Ian Woods for critical comments on the manuscript; Joon Lee for help with processing the data; and Steve Zimmerman for fish care. The HNK-1 (zn-12) antibody was

obtained from the Developmental studies Hybridoma Bank developed under the auspices of the NICHD and maintained by the University of Iowa, Department of Biological Sciences, Iowa City, IA. This research was supported by a predoctoral fellowship from the Canadian Institute of Health Research to S.J.C.C., a Helen Hay Whitney Foundation fellowship to D.P. and NIH grant RO1 NS049319 to A.F.S.

### Supplementary material

Supplementary material for this article is available at <http://dev.biologists.org/cgi/content/full/135/19/3259/DC1>

### References

- Andermann, P., Ungos, J. and Raible, D. W. (2002). Neurogenin1 defines zebrafish cranial sensory ganglia precursors. *Dev. Biol.* **251**, 45–58.
- Ando, R., Hama, H., Yamamoto-Hino, M., Mizuno, H. and Miyawaki, A. (2002). An optical marker based on the UV-induced green-to-red photoconversion of a fluorescent protein. *Proc. Natl. Acad. Sci. USA* **99**, 12651–12656.
- Bandell, M., Story, G. M., Hwang, S. W., Viswanath, V., Eid, S. R., Petrus, M. J., Earley, T. J. and Patapoutian, A. (2004). Noxious cold ion channel TRPA1 is activated by pungent compounds and bradykinin. *Neuron* **41**, 849–857.
- Bautista, D. M., Jordt, S. E., Nikai, T., Tsuruda, P. R., Read, A. J., Poblete, J., Yamoah, E. N., Basbaum, A. I. and Julius, D. (2006). TRPA1 mediates the inflammatory actions of environmental irritants and proalgesic agents. *Cell* **124**, 1269–1282.
- Belliveau, M. J. and Cepko, C. L. (1999). Extrinsic and intrinsic factors control the genesis of amacrine and cone cells in the rat retina. *Development* **126**, 555–566.
- Boue-Grabot, E., Akimenko, M. A. and Seguela, P. (2000). Unique functional properties of a sensory neuronal P2X ATP-gated channel from zebrafish. *J. Neurochem.* **75**, 1600–1607.
- Carr, V. M. and Simpson, S. B., Jr (1978). Proliferative and degenerative events in the early development of chick dorsal root ganglia. II. Responses to altered peripheral fields. *J. Comp. Neurol.* **182**, 741–755.
- Caterina, M. J., Schumacher, M. A., Tominaga, M., Rosen, T. A., Levine, J. D. and Julius, D. (1997). The capsaicin receptor: a heat-activated ion channel in the pain pathway. *Nature* **389**, 816–824.
- Chen, C. C., Akopian, A. N., Sivilotti, L., Colquhoun, D., Burnstock, G. and Wood, J. N. (1995). A P2X purinoceptor expressed by a subset of sensory neurons. *Nature* **377**, 428–431.
- Cornell, R. A. and Eisen, J. S. (2002). Delta/Notch signaling promotes formation of zebrafish neural crest by repressing Neurogenin 1 function. *Development* **129**, 2639–2648.
- Frank, E. and Sanes, J. R. (1991). Lineage of neurons and glia in chick dorsal root ganglia: analysis in vivo with a recombinant retrovirus. *Development* **111**, 895–908.
- Golling, G., Amsterdam, A., Sun, Z., Antonelli, M., Maldonado, E., Chen, W., Burgess, S., Haldi, M., Artzt, K., Farrington, S. et al. (2002). Insertional mutagenesis in zebrafish rapidly identifies genes essential for early vertebrate development. *Nat. Genet.* **31**, 135–140.
- Hatta, K., Tsujii, H. and Omura, T. (2006). Cell tracking using a photoconvertible fluorescent protein. *Nat. Protoc.* **1**, 960–967.
- Jordt, S. E., Bautista, D. M., Chuang, H. H., McKemy, D. D., Zygmunt, P. M., Hogestatt, E. D., Meng, I. D. and Julius, D. (2004). Mustard oils and cannabinoids excite sensory nerve fibres through the TRP channel ANKTM1. *Nature* **427**, 260–265.
- Julius, D. and Basbaum, A. I. (2001). Molecular mechanisms of nociception. *Nature* **413**, 203–210.
- Kim, C. H., Ueshima, E., Muraoka, O., Tanaka, H., Yeo, S. Y., Huh, T. L. and Miki, N. (1996). Zebrafish *elav/HuC* homologue as a very early neuronal marker. *Neurosci. Lett.* **216**, 109–112.
- Kimmel, C. B., Ballard, W. W., Kimmel, S. R., Ullmann, B. and Schilling, T. F. (1995). Stages of embryonic development of the zebrafish. *Dev. Dyn.* **203**, 253–310.
- Kimura, Y., Okamura, Y. and Higashijima, S. (2006). *alx*, a zebrafish homolog of Chx10, marks ipsilateral descending excitatory interneurons that participate in the regulation of spinal locomotor circuits. *J. Neurosci.* **26**, 5684–5697.
- Knaut, H., Blader, P., Strahle, U. and Schier, A. F. (2005). Assembly of trigeminal sensory ganglia by chemokine signaling. *Neuron* **47**, 653–666.
- Kucenas, S., Soto, F., Cox, J. A. and Voigt, M. M. (2006). Selective labeling of central and peripheral sensory neurons in the developing zebrafish using P2X(3) receptor subunit transgenes. *Neuroscience* **138**, 641–652.
- Kwan, K. Y., Allchorne, A. J., Vollrath, M. A., Christensen, A. P., Zhang, D. S., Woolf, C. J. and Corey, D. P. (2006). TRPA1 contributes to cold, mechanical, and chemical nociception but is not essential for hair-cell transduction. *Neuron* **50**, 277–289.
- Lawson, S. N. and Biscoe, T. J. (1979). Development of mouse dorsal root ganglia: an autoradiographic and quantitative study. *J. Neurocytol.* **8**, 265–274.

- Lynn, B.** (1975). Somatosensory receptors and their CNS connections. *Annu. Rev. Physiol.* **37**, 105-127.
- Lyons, D. A., Pogoda, H. M., Voas, M. G., Woods, I. G., Diamond, B., Nix, R., Arana, N., Jacobs, J. and Talbot, W. S.** (2005). *erbb3* and *erbb2* are essential for schwann cell migration and myelination in zebrafish. *Curr. Biol.* **15**, 513-524.
- Ma, Q., Fode, C., Guillemot, F. and Anderson, D. J.** (1999). Neurogenin1 and neurogenin2 control two distinct waves of neurogenesis in developing dorsal root ganglia. *Genes Dev.* **13**, 1717-1728.
- Marmigere, F. and Ernfors, P.** (2007). Specification and connectivity of neuronal subtypes in the sensory lineage. *Nat. Rev. Neurosci.* **8**, 114-127.
- Maro, G. S., Vermeren, M., Voiculescu, O., Melton, L., Cohen, J., Charnay, P. and Topilko, P.** (2004). Neural crest boundary cap cells constitute a source of neuronal and glial cells of the PNS. *Nat. Neurosci.* **7**, 930-938.
- Marusich, M. F., Furneaux, H. M., Henion, P. D. and Weston, J. A.** (1994). Hu neuronal proteins are expressed in proliferating neurogenic cells. *J. Neurobiol.* **25**, 143-155.
- McConnell, S. K.** (1995). Constructing the cerebral cortex: neurogenesis and fate determination. *Neuron* **15**, 761-768.
- Noden, D. M.** (1980). Somatotopic and functional organization of the avian trigeminal ganglion: an HRP analysis in the hatchling chick. *J. Comp. Neurol.* **190**, 405-428.
- Ober, E. A. and Schulte-Merker, S.** (1999). Signals from the yolk cell induce mesoderm, neuroectoderm, the trunk organizer, and the notochord in zebrafish. *Dev. Biol.* **215**, 167-181.
- Pearson, B. J. and Doe, C. Q.** (2003). Regulation of neuroblast competence in *Drosophila*. *Nature* **425**, 624-628.
- Pearson, B. J. and Doe, C. Q.** (2004). Specification of temporal identity in the developing nervous system. *Annu. Rev. Cell Dev. Biol.* **20**, 619-647.
- Sagasti, A., Guido, M. R., Raible, D. W. and Schier, A. F.** (2005). Repulsive interactions shape the morphologies and functional arrangement of zebrafish peripheral sensory arbors. *Curr. Biol.* **15**, 804-814.
- Saint-Amant, L. and Drapeau, P.** (1998). Time course of the development of motor behaviors in the zebrafish embryo. *J. Neurobiol.* **37**, 622-632.
- Sato, T., Takahoko, M. and Okamoto, H.** (2006). HuC:Kaede, a useful tool to label neural morphologies in networks *in vivo*. *Genesis* **44**, 136-142.
- Swett, J. E. and Woolf, C. J.** (1985). The somatotopic organization of primary afferent terminals in the superficial laminae of the dorsal horn of the rat spinal cord. *J. Comp. Neurol.* **231**, 66-77.
- Trevarrow, B., Marks, D. L. and Kimmel, C. B.** (1990). Organization of hindbrain segments in the zebrafish embryo. *Neuron* **4**, 669-679.
- Truman, J. W. and Bate, M.** (1988). Spatial and temporal patterns of neurogenesis in the central nervous system of *Drosophila melanogaster*. *Dev. Biol.* **125**, 145-157.
